# Supplementary figures and images for: Two-photon imaging in mice shows striosomes and matrix have overlapping but differential reinforcement-related responses
Source: eLife journal article supplement (doi:10.7554/elife.32353), 2017-12-18

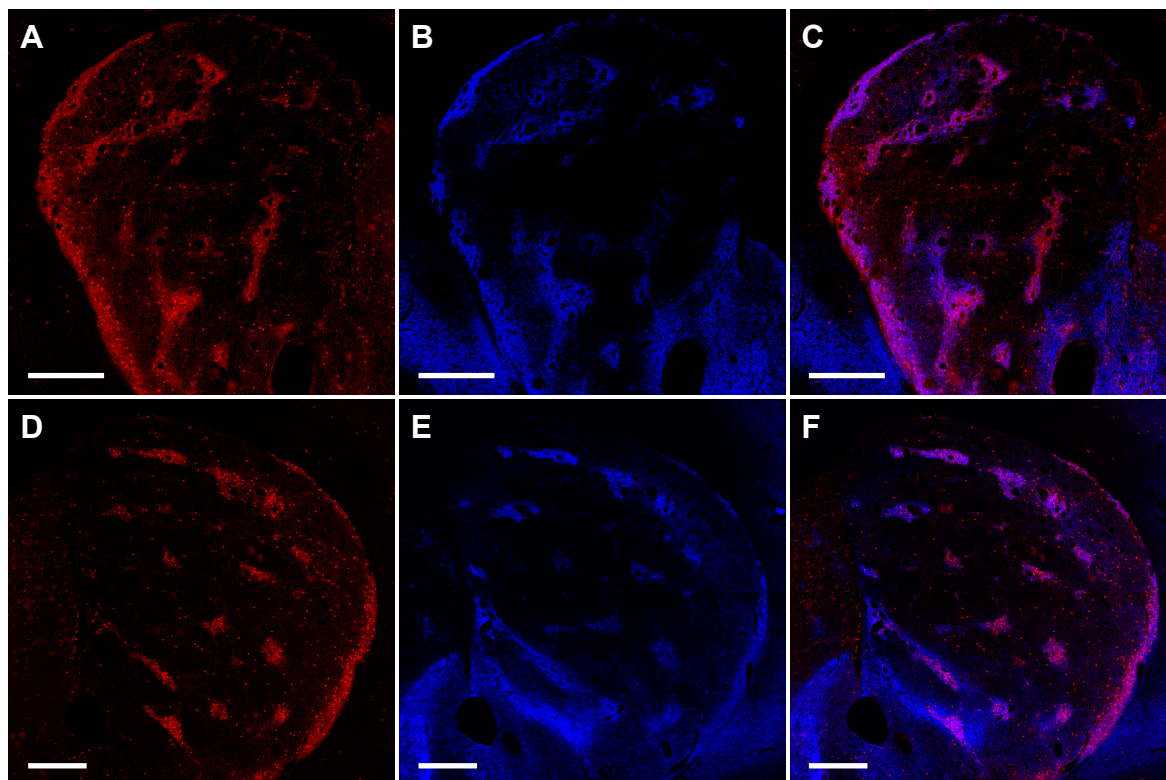

Figure 1—figure supplement 1

Supplement: supp [file elife_poa_e32353_Figure_1_figure_supplement_1.pdf › elife_poa_e32353_Figure_1_figure_supplement_1.pdf]

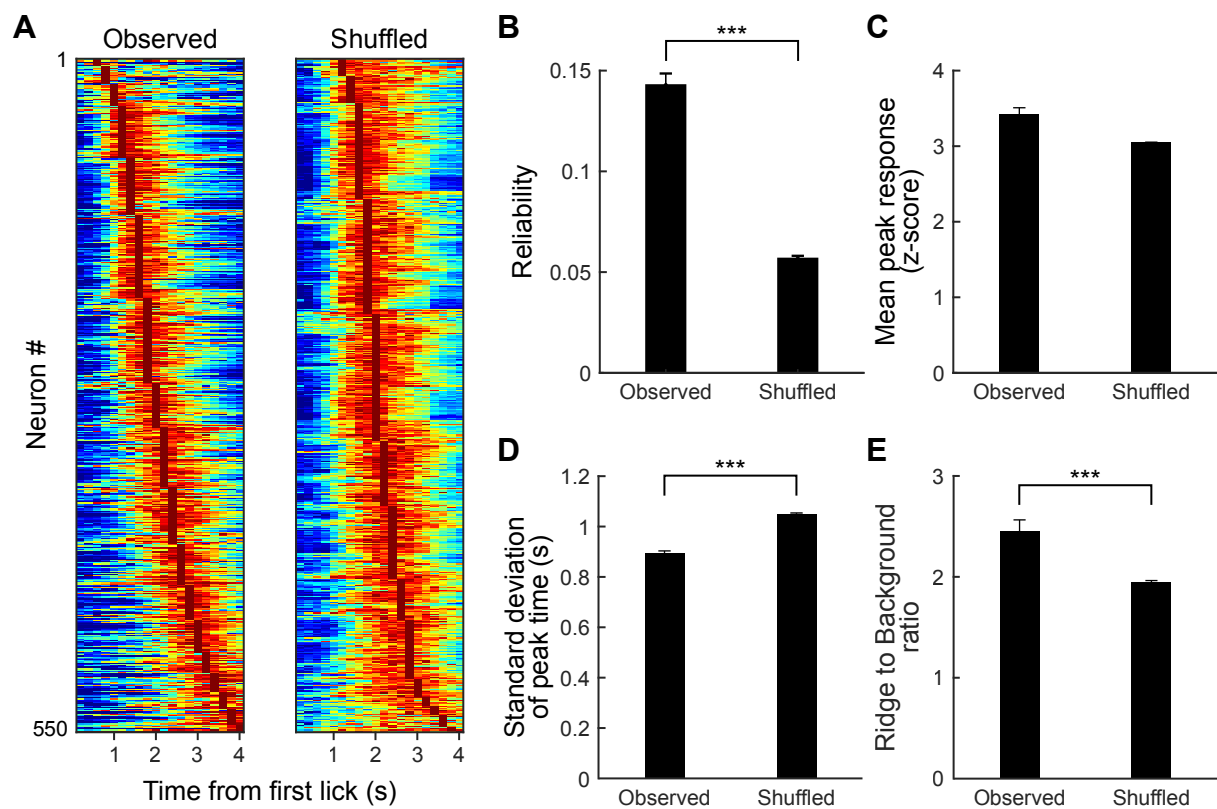

Figure 4—figure supplement 1

Supplement: supp [file elife_poa_e32353_Figure_4_figure_supplement_1.pdf › elife_poa_e32353_Figure_4_figure_supplement_1.pdf]

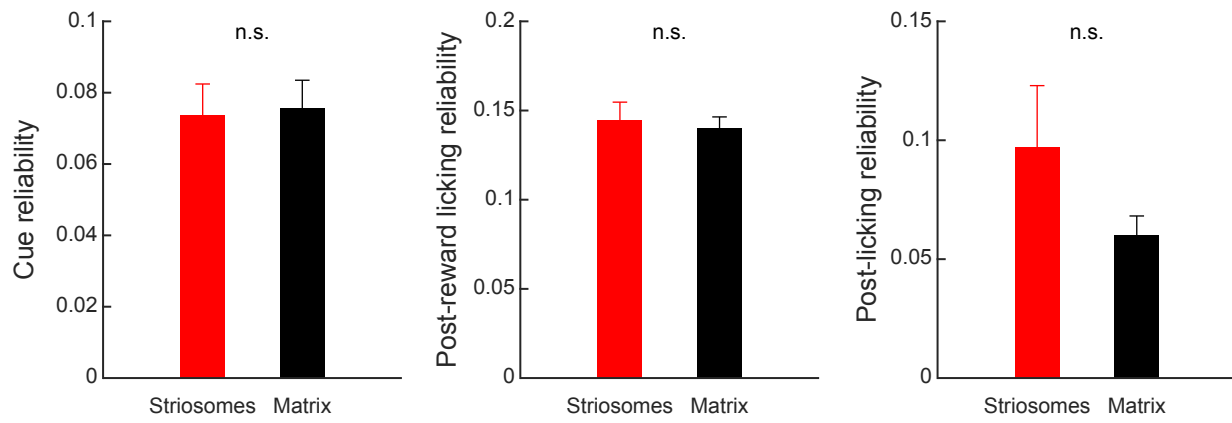

**Figure 5—figure supplement 1**

Supplement: supp [file elife_poa_e32353_Figure_5_figure_supplement_1.pdf › elife_poa_e32353_Figure_5_figure_supplement_1.pdf]

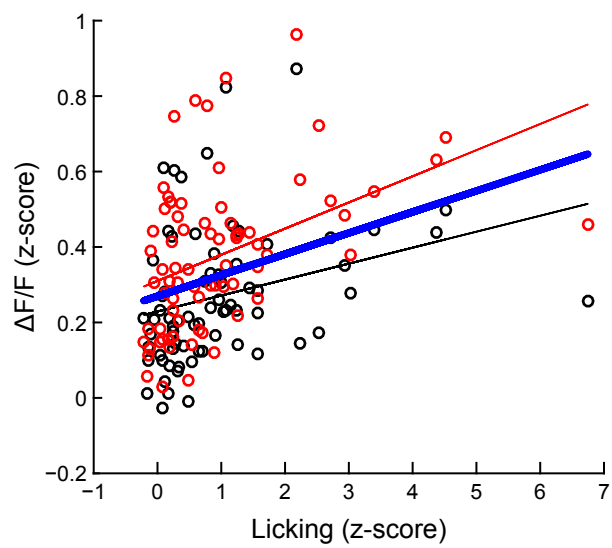

**Figure 7—figure supplement 1**

Supplement: supp [file elife_poa_e32353_Figure_7_figure_supplement_1.pdf › elife_poa_e32353_Figure_7_figure_supplement_1.pdf]
